# Supplementary material
Source: ML conference proceedings conference paper supplement (https://openaccess.thecvf.com/content/cvpr_2015/html/Liu_GRSA_Generalized_Range_2015_CVPR_paper.html)
Supplement: Supplementary file 1 [file Liu_GRSA_Generalized_Range_2015_CVPR_supplemental.pdf]

# GRSA: Generalized Range Swap Algorithm for the Efficient Optimization of MRFs

## 1. Proof of Theorem 1

Before proving Theorem 1, we first give the following lemmas and the definition of *submodular set*.

**Lemma 1.** For  $b_1, b_2 > 0$ , the following conclusion holds.

$$\frac{a_1}{b_1} \geq \frac{a_2}{b_2} \Leftrightarrow \frac{a_1}{b_1} \geq \frac{a_1 + a_2}{b_1 + b_2} \geq \frac{a_2}{b_2}. \quad (1)$$

The proof is straightforward and we omit it.

**Lemma 2.** Assuming that function  $g(x)$  is convex on  $[a, b]$  and there are three points  $x_1, x, x_2 \in [a, b]$  satisfying  $x_1 > x > x_2$ , there is

$$\frac{g(x_1) - g(x)}{x_1 - x} \geq \frac{g(x_1) - g(x_2)}{x_1 - x_2} \geq \frac{g(x) - g(x_2)}{x - x_2}. \quad (2)$$

*Proof.* Since  $x_1 > x > x_2$ , there exists  $\lambda \in (0, 1)$  satisfying  $x = (1 - \lambda)x_1 + \lambda x_2$ . Then by the definition of convex function, there is  $(1 - \lambda)g(x_1) + \lambda g(x_2) \geq g(x)$  and thus

$$(1 - \lambda)(g(x_1) - g(x)) \geq \lambda(g(x) - g(x_2)) \quad (3)$$

Considering that  $x_1 > x_2$  and  $0 < \lambda < 1$ , we can divide  $\lambda(1 - \lambda)(x_1 - x_2)$  on both sides of (3) and obtain

$$\frac{g(x_1) - g(x)}{\lambda(x_1 - x_2)} \geq \frac{g(x) - g(x_2)}{(1 - \lambda)(x_1 - x_2)} \quad (4)$$

$$\frac{g(x_1) - g(x)}{x_1 - x} \geq \frac{g(x) - g(x_2)}{x - x_2}. \quad (5)$$

At last, the conclusion (2) can be proved by applying Lemma 1 to (5).  $\square$

**Lemma 3.** Assuming that  $g(x)$  is convex on  $[a, b]$  and there are four points  $x_1, x_2, x_3, x_4 \in [a, b]$  satisfying  $x_1 > x_3 \geq x_4$  and  $x_1 \geq x_2 > x_4$ , there is

$$\frac{g(x_1) - g(x_3)}{x_1 - x_3} \geq \frac{g(x_2) - g(x_4)}{x_2 - x_4}. \quad (6)$$

*Proof.* 1. If  $x_2 = x_3$ , the conclusion is straightforward by Lemma 2.

2. If  $x_2 > x_3$ , there is  $x_1 \geq x_2 > x_3 \geq x_4$ . We first consider the case where  $x_1 > x_2 > x_3 > x_4$  and can use Lemma 2 to obtain (6) by

$$\frac{g(x_1) - g(x_3)}{x_1 - x_3} \geq \frac{g(x_2) - g(x_3)}{x_2 - x_3} \geq \frac{g(x_2) - g(x_4)}{x_2 - x_4}.$$

For the case where  $x_1 = x_2 > x_3 > x_4$ , the right half of the above inequality holds and we can obtain (6) by replacing  $x_2$  with  $x_1$ . The case where  $x_1 > x_2 > x_3 = x_4$  can be obtained in a similar way while the case where  $x_1 = x_2 > x_3 = x_4$  is straightforward.

3. If  $x_2 < x_3$ , there is  $x_1 > x_3 > x_2 > x_4$ . Using Lemma 2, we can obtain (6) by

$$\frac{g(x_1) - g(x_3)}{x_1 - x_3} \geq \frac{g(x_3) - g(x_2)}{x_3 - x_2} \geq \frac{g(x_2) - g(x_4)}{x_2 - x_4}$$

Therefore, the proof of Lemma 3 is completed.  $\square$

**Lemma 4.** Given a function  $g(x)$  ( $x = |\alpha - \beta|$ ) on domain  $X = [0, c]$ , assume  $g(x)$  is locally convex on interval  $X_s = [a, b]$  ( $0 \leq a < b \leq c$ ), and it satisfies  $a\{g(a+1) - g(a)\} \geq g(a) - g(0)$ . Then we have

$$\frac{g(x_1) - g(x_3)}{x_1 - x_3} \geq \frac{g(x_2) - g(0)}{x_2} \quad (7)$$

where  $x_1, x_2, x_3 \in X_s$  where  $x_3 < x_1$  and  $x_2 < x_1$ .

*Proof.* Since  $x_1 > x_3 \geq a$  and  $x_1 \in \mathbb{N}$ , we have  $x_1 \geq a + 1 > a$ . Then considering that  $x_1 > x_3 \geq a$ , we can use Lemma 3 to obtain

$$\frac{g(x_1) - g(x_3)}{x_1 - x_3} \geq \frac{g(a+1) - g(a)}{a+1-a} \geq \frac{g(a) - g(0)}{a}, \quad (8)$$

where the second inequality comes from  $a\{g(a+1) - g(a)\} \geq g(a) - g(0)$ .

If  $x_2 = a$ , the conclusion is obtained from (8). Otherwise, there is  $x_1 > x_2 > a$  and  $x_1 > x_3 \geq a$ . Using Lemma 3, we obtain

$$\frac{g(x_1) - g(x_3)}{x_1 - x_3} \geq \frac{g(x_2) - g(a)}{x_2 - a}. \quad (9)$$

Combining (8) and (9), we can obtain

$$\begin{aligned} \frac{g(x_1) - g(x_3)}{x_1 - x_3} &\geq \max \left\{ \frac{g(x_2) - g(a)}{x_2 - a}, \frac{g(a) - g(0)}{a} \right\} \\ &\geq \frac{g(x_2) - g(a) + g(a) - g(0)}{x_2 - a + a} \\ &= \frac{g(x_2) - g(0)}{x_2}, \end{aligned}$$

where the second inequality is due to Lemma 1 and this completes the proof.  $\square$

**Definition 1.** Given a pairwise potential  $\theta(\alpha, \beta)$ , we call  $\mathcal{L}_s$  a submodular set, if it satisfies

$$\theta(l_{i+1}, l_j) - \theta(l_{i+1}, l_{j+1}) - \theta(l_i, l_j) + \theta(l_i, l_{j+1}) \geq 0 \quad (10)$$

for any pair of labels  $l_i, l_j \in \mathcal{L}_s (1 \leq i, j < m)$ .

**Theorem 1.** Given a pairwise function  $\theta(\alpha, \beta) = g(x)$  ( $x = |\alpha - \beta|$ ) on domain  $X = [0, c]$ , assume there is an interval  $X_s = [a, b]$  ( $0 \leq a < b \leq c$ ) satisfying: (i)  $g(x)$  is locally convex on  $[a, b]$ , and (ii)  $a\{g(a+1) - g(a)\} \geq g(a) - g(0)$ . Then  $\mathcal{L}_s = \{l_1, \dots, l_m\}$  is a submodular subset, if  $|l_i - l_j| \in [a, b]$  for any pair of labels  $l_i, l_j \in \mathcal{L}_s$ .

*Proof.* Since  $\theta(\alpha, \beta)$  is semimetric and satisfies  $\theta(\alpha, \beta) = \theta(\beta, \alpha)$ , we only consider  $l_i, l_{i+1}, l_j, l_{j+1} \in \mathcal{L}_s$  where  $i \geq j$ . Let

$$\begin{aligned} x_1 &= l_{i+1} - l_j, & x_2 &= l_{i+1} - l_{j+1}, \\ x_3 &= l_i - l_j, & x_4 &= l_i - l_{j+1} \end{aligned}$$

For  $i \geq j$ , we have  $x_i > x_j$ , and  $x_1 - x_2 = x_3 - x_4$ . We can define

$$\lambda = \frac{x_3 - x_4}{x_1 - x_4} = \frac{x_1 - x_2}{x_1 - x_4}, \quad (0 < \lambda < 1) \quad (11)$$

then, we get

$$x_3 = \lambda x_1 + (1 - \lambda)x_4, \quad x_2 = \lambda x_4 + (1 - \lambda)x_1. \quad (12)$$

If  $a = 0$ , i.e.  $X_s = [0, b]$  we have  $x_1, x_2, x_3, x_4 \in X_s$  according to the assumption in Theorem 1. Since  $d(x)$  is convex on  $X_s$ , with Eq. (12) we obtain

$$\begin{aligned} g(x_3) &\leq \lambda g(x_1) + (1 - \lambda)g(x_4), \\ g(x_2) &\leq \lambda g(x_4) + (1 - \lambda)g(x_1) \end{aligned} \quad (13)$$

Summing the two equations in Eq. (13), we can get

$$g(x_2) + g(x_3) \leq g(x_1) + g(x_4)$$

Thus,  $\theta(l_{i+1}, l_j) - \theta(l_{i+1}, l_{j+1}) - \theta(l_i, l_j) + \theta(l_i, l_{j+1}) \geq 0$  is satisfied for any pair of label  $l_i, l_j \in \mathcal{L}_s$ .

If  $a > 0$  ( $X_s = [a, b]$ ), we prove the theorem in three cases:

1)  $i = j$ ; 2)  $i > j + 1$ ; 3)  $i = j + 1$ .

1) When  $i = j$ , we have

$$\begin{aligned} &\theta(l_{i+1}, l_j) - \theta(l_{i+1}, l_{j+1}) - \theta(l_i, l_j) + \theta(l_i, l_{j+1}) \\ &= \theta(l_{i+1}, l_i) - \theta(l_{i+1}, l_{i+1}) - \theta(l_i, l_i) + \theta(l_i, l_{i+1}) \\ &= \theta(l_{i+1}, l_i) - 0 - 0 + \theta(l_i, l_{i+1}) \\ &= 2\theta(l_{i+1}, l_i) \geq 0 \end{aligned}$$

2) When  $i > j + 1$ , we have  $x_1, x_2, x_3, x_4 \in X_s$  according to the assumption in Theorem 1. Since  $d(x)$  is convex on  $X_s$ , with Eq. (12) we obtain

$$\begin{aligned} g(x_3) &\leq \lambda g(x_1) + (1 - \lambda)g(x_4), \\ g(x_2) &\leq \lambda g(x_4) + (1 - \lambda)g(x_1) \end{aligned} \quad (14)$$

Summing the two equations in Eq. (14), we can get

$$g(x_2) + g(x_3) \leq g(x_1) + g(x_4)$$

Thus,  $\theta(l_{i+1}, l_j) - \theta(l_{i+1}, l_{j+1}) - \theta(l_i, l_j) + \theta(l_i, l_{j+1}) \geq 0$  is satisfied for any pair of label  $l_i, l_j \in \mathcal{L}_s$  and  $i > j + 1$ .

3) When  $i = j + 1$ , we have

$$\begin{aligned} x_1 &= l_{j+2} - l_j, & x_2 &= l_{j+2} - l_{j+1}, \\ x_3 &= l_{j+1} - l_j, & x_4 &= 0 \end{aligned}$$

Thus, we have  $x_1 = x_2 + x_3$ , and  $x_1, x_2, x_3 \in X_s$  but  $x_4 \notin X_s$ .

With Lemma 4, we have

$$\frac{g(x_1) - g(x_3)}{x_1 - x_3} \geq \frac{g(x_2) - g(0)}{x_2}. \quad (15)$$

Thus we can get

$$g(x_2) + g(x_3) \leq g(x_1) + g(x_4)$$

and  $\theta(l_{i+1}, l_j) - \theta(l_{i+1}, l_{j+1}) - \theta(l_i, l_j) + \theta(l_i, l_{j+1}) \geq 0$  is satisfied for any pair of labels  $l_i, l_j \in \mathcal{L}_s$  and  $i = j + 1$ .

Therefore,  $\theta(l_{i+1}, l_j) - \theta(l_{i+1}, l_{j+1}) - \theta(l_i, l_j) + \theta(l_i, l_{j+1}) \geq 0$  is satisfied for any pair of labels  $l_i, l_j \in \mathcal{L}_s$ . The proof is completed.  $\square$

**Corollary 1** (Theorem 1). Assuming the interval  $[a, b]$  is a candidate interval, then  $\{\alpha, \alpha + x_1, \alpha + x_1 + x_2, \dots, \alpha + x_1 + \dots + x_m\} \subseteq \mathcal{L}$  is a submodular set, if  $x_1, \dots, x_m \in [a, b]$  and  $x_1 + \dots + x_m \leq b$ .

*Proof.* Let  $\mathcal{L}_s = \{\alpha, \alpha + x_1, \alpha + x_1 + x_2, \dots, \alpha + x_1 + \dots + x_m\}$ . We consider a pair of labels  $\alpha_1$  and  $\alpha_2$ , which can be any pair of labels chosen in  $\mathcal{L}_s$ . According to the definition, there always exist  $p, q$  ( $1 \leq p, q \leq m$ ) such that

$$|\alpha_1 - \alpha_2| = x_p + x_{p+1} + \dots + x_q.$$

Since  $x_i \in [a, b]$  for  $\forall i \in [p, q]$ , we have  $|\alpha_1 - \alpha_2| \geq a$ .

Since  $x_1 + \dots + x_m \leq b$ , we have  $x_p + x_{p+1} + \dots + x_q \leq b$ .

Thus, we have  $|\alpha_1 - \alpha_2| \in [a, b]$  for any pair of labels

$\alpha_1, \alpha_2 \in \mathcal{L}_s$

Thus,  $\mathcal{L}_s$  is a submodular set according to Theorem 1.

□
